# Supplementary material
Source: Springer Nature journal article supplement (https://www.springermedizin.de/resource/supplementary/13063_2010_643_MOESM3_ESM.pdf/9618384)

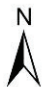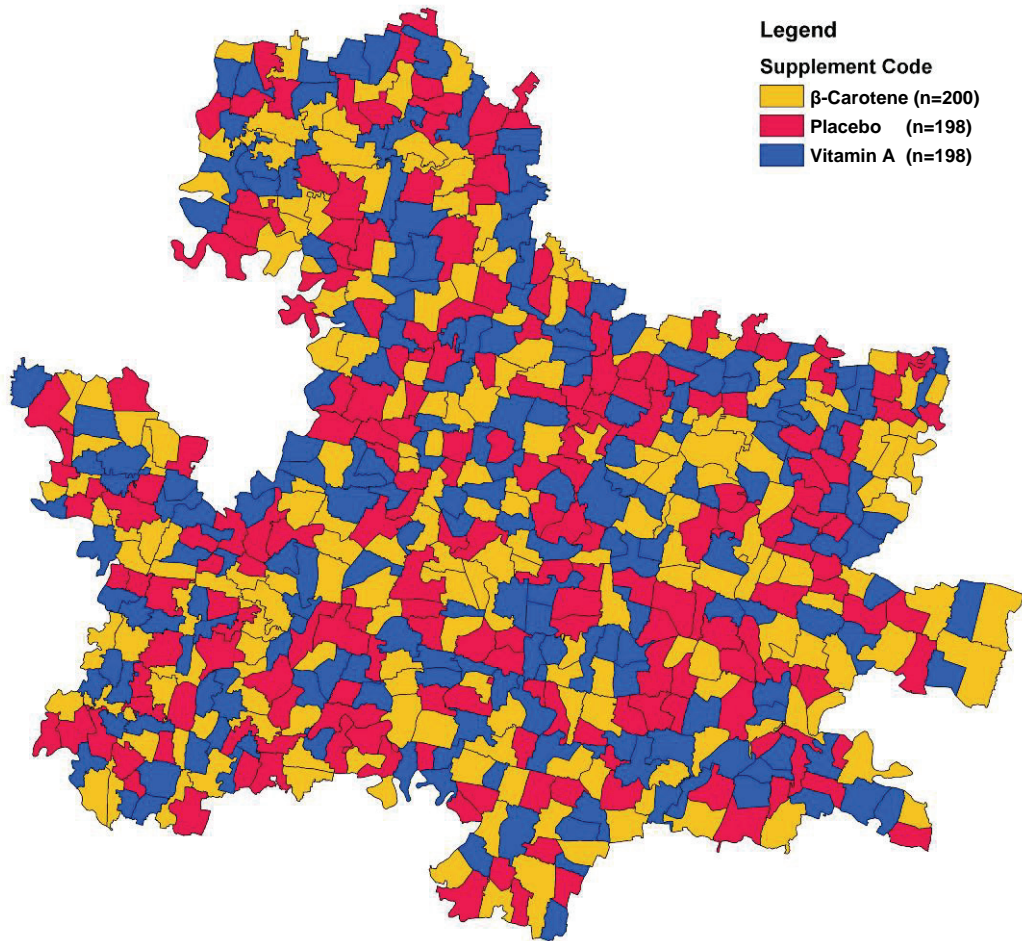

Supplement: MOESM3 [file 9618384]
